# Supplementary material
Source: PubMed Central journal article supplement (PMC5668134)
Supplement: NIHMS598103-supplement-01.pdf [file NIHMS598103-supplement-01.pdf]

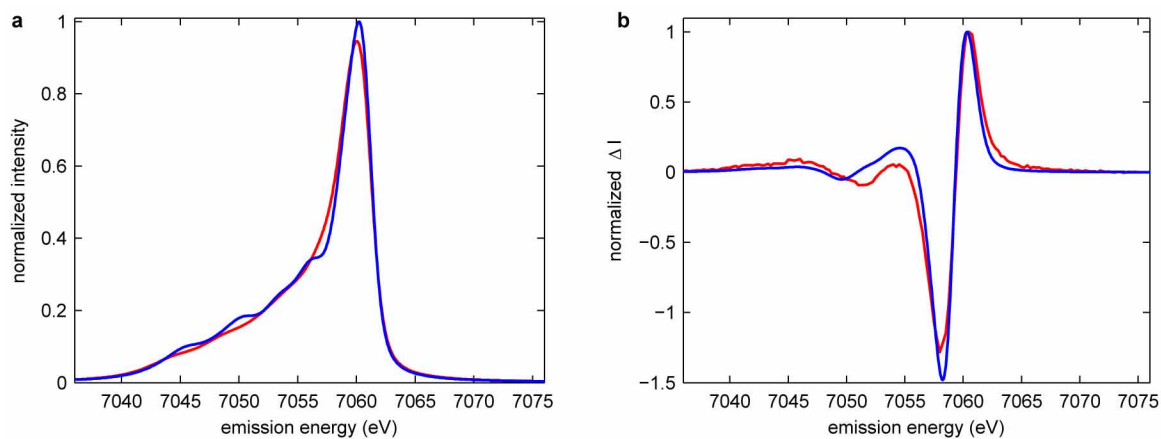

**Extended Data Figure 1 | Experimental and calculated K $\beta$  fluorescence spectra for triplet spin states.** **a**, The calculated K $\beta$  fluorescence spectra of iron complexes: triplet Fe(II) in square planar crystal field (red) (calculation parameters based on Fe(II)phthalocyanine), and triplet excited state in an octahedral crystal field (blue) (calculation parameters based on [Fe(2,2'-bipyridine) $_3$ ] $^{2+}$ ). **b**, The experimental K $\beta$  fluorescence difference spectrum

(red) obtained by subtracting the singlet [Fe(2,2'-bipyridine) $_3$ ] $^{2+}$  spectrum from the triplet Fe(II)phthalocyanine spectrum, and the calculated K $\beta$  fluorescence difference spectrum (blue) generated by subtracting the spectrum of the singlet state in an octahedral crystal field from the triplet state in a square planar crystal field.

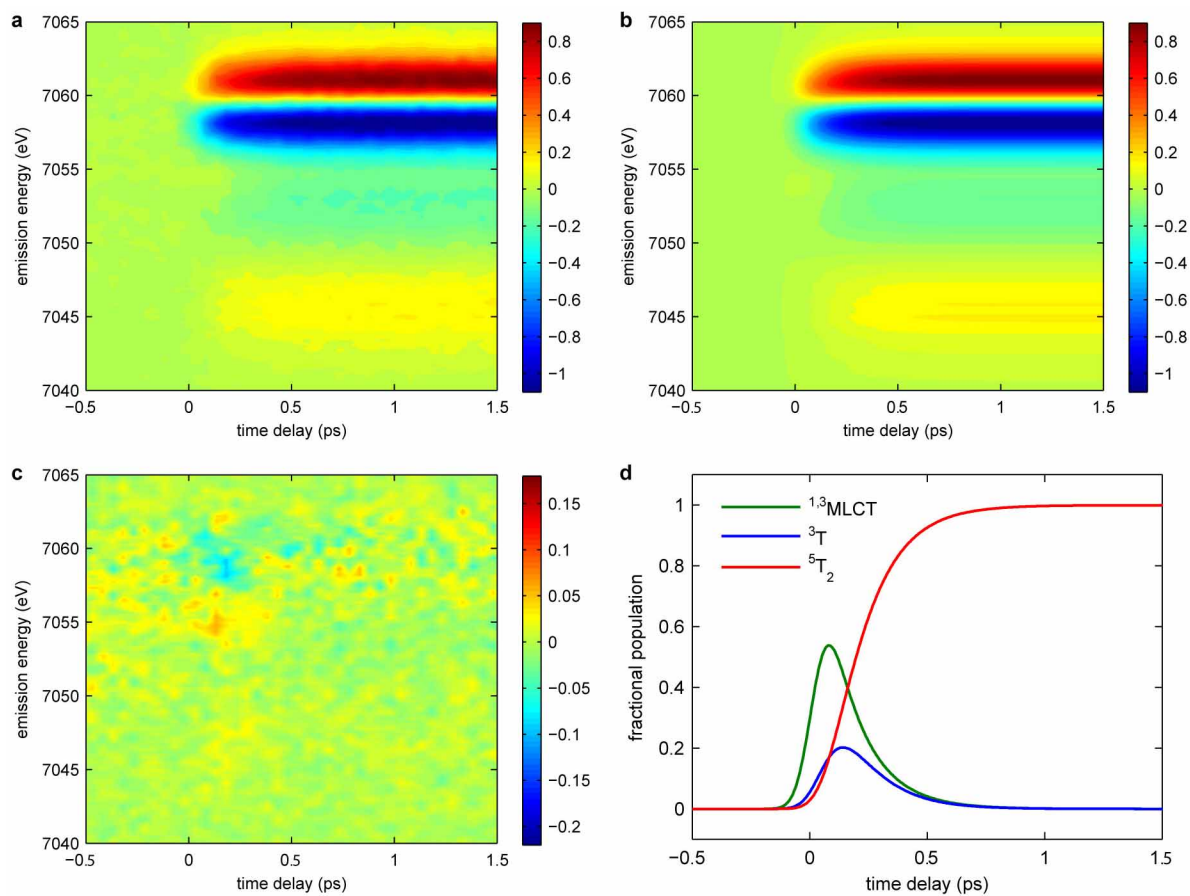

**Extended Data Figure 2 | Time-dependent K $\beta$  fluorescence spectra and fit using the sequential kinetic model with a triplet transient.** **a**, Experimental transient fluorescent amplitude difference spectra plotted with arbitrary units, and **b**, fit using the sequential kinetic model with a triplet transient.

**c**, Residuals for the best fit, with the colour-scale maximum and minimum set to one-fifth of the value used in **a** and **b**. **d**, The excited state populations extracted from the best fit.

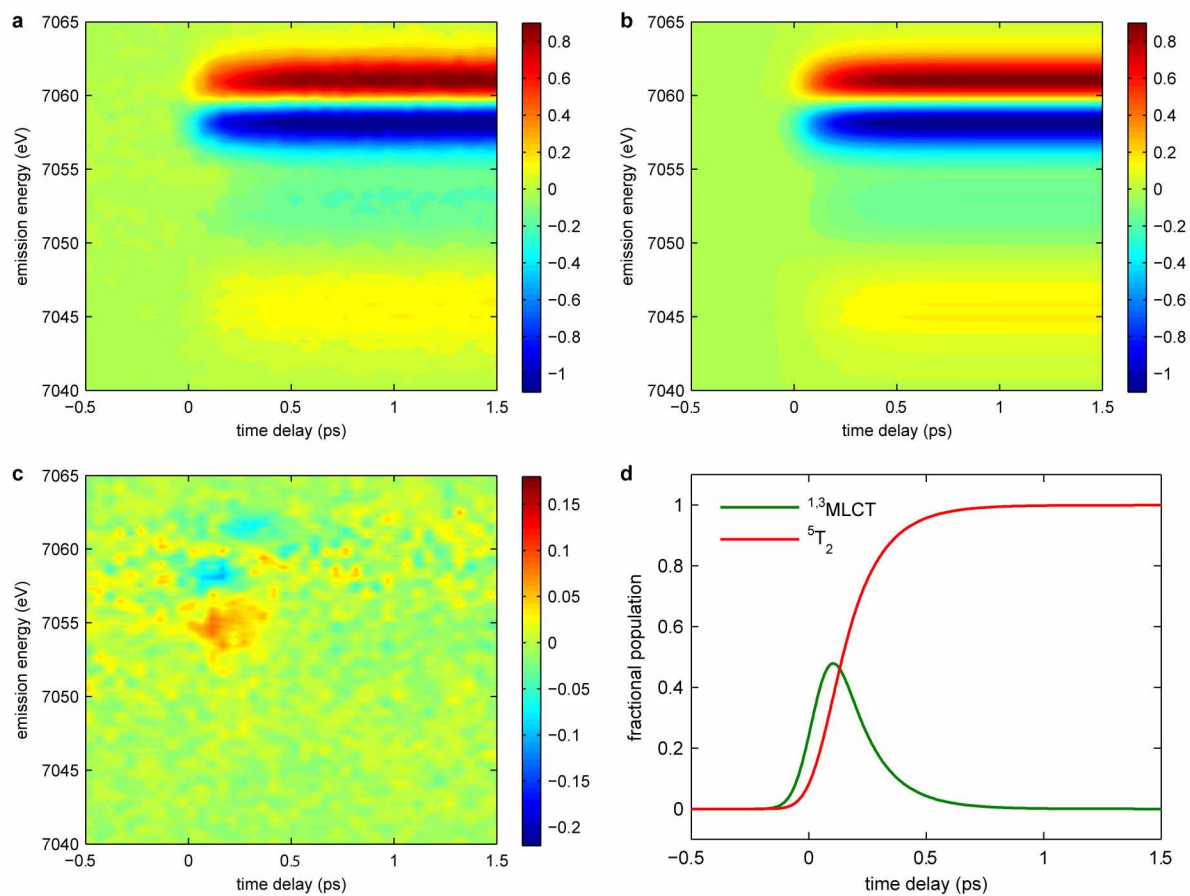

**Extended Data Figure 3 | Time-dependent K $\beta$  fluorescence spectra and fit using the direct kinetic model without a triplet transient.** **a**, Experimental transient fluorescent amplitude difference spectra plotted with arbitrary units, and **b**, fit using the direct kinetic model without a triplet transient.

**c**, Residuals for the best fit with the colour scale maximum and minimum set to one-fifth of the value used in **a** and **b**. **d**, The excited state populations extracted from the best fit.

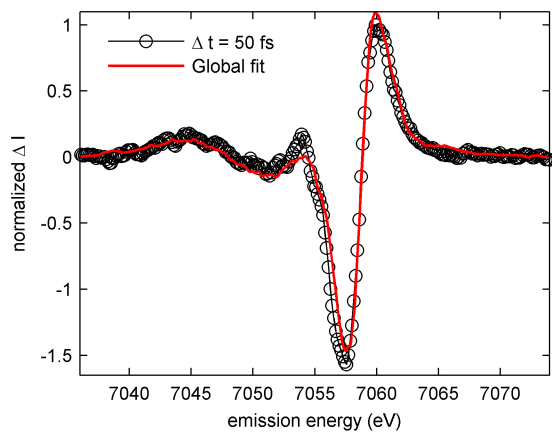

**Extended Data Figure 4 | The 50 fs time delay normalized K $\beta$  fluorescent amplitude difference spectrum ( $\Delta I$ ) and kinetic model fit plotted as a function of X-ray emission energy.** The measured data (black circles and line), along with the best global fit from the sequential kinetic model with a transient triplet state (red line).

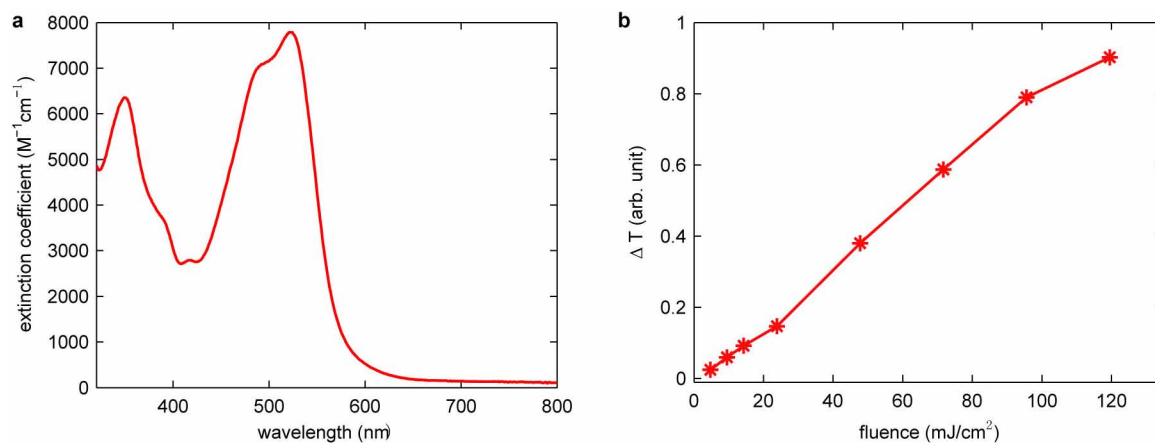

**Extended Data Figure 5 | Absorption spectrum and pump power dependence measurements.** **a**, The ultraviolet–visible absorption spectrum of  $[\text{Fe}(2,2'\text{-bipyridine})_3]^{2+}$  in water. **b**, Power (fluence) dependence of the change in probe transmission measured at 520 nm, following excitation of an

aqueous solution of  $[\text{Fe}(2,2'\text{-bipyridine})_3]\text{Cl}_2$  with a 520 nm pump pulse. The figure shows the change in transmission ( $\Delta T$ ) measured at a 10 ps time delay, a time long compared to the spin crossover and vibrational cooling timescales, but short compared to the lifetime of the high-spin excited state.

**Extended Data Table 1 | Fitted model parameters**

| Kinetic model             | lifetime     | lifetime     | Time zero  | Instrument response |              |
|---------------------------|--------------|--------------|------------|---------------------|--------------|
|                           | $1/k_1$ (fs) | $1/k_2$ (fs) | $t_0$ (fs) | $\sigma$ (fs)       | FWHM(fs)     |
| with triplet transient    | $150 \pm 50$ | $70 \pm 30$  | $0 \pm 7$  | $56 \pm 8$          | $130 \pm 20$ |
| without triplet transient | $140 \pm 12$ |              | $15 \pm 6$ | $70 \pm 7$          | $170 \pm 15$ |

Values shown are extracted from fits to sequential and direct spin crossover models for photo-excited  $[\text{Fe}(\text{2,2}'\text{-bipyridine})_3]^{2+}$  in water. We compute the time constants and uncertainties by fitting six runs of the same experiment and then calculating the mean and standard deviation.
